# Supplementary material for: Efficient catalytic conversion of lignocellulosic biomass into renewable liquid biofuels via furan derivatives
Source: Royal Society of Chemistry journal article supplement (doi:10.1039/c4ra04900d), 2014-01-01
Supplement: c4ra04900d1.pdf [file c4ra04900d1.pdf]

Electronic Supplementary Material (ESI) for Green Chemistry.  
This journal is © the Royal Society of Chemistry 2014

**Electronic Supplementary Information**

**Efficient catalytic conversion of lignocellulosic biomass into  
renewable liquid biofuels *via* furan derivatives**

Jianjian Wang, Xiaohui Liu, Bicheng Hu, Guanzhong Lu\*, and Yanqin Wang\*

\* Key Lab for Advanced Materials, Research Institute of Industrial Catalysis, East China

University of Science and Technology, Shanghai, 200237, P. R. China. E-mail:

[gzhlu@ecust.edu.cn](mailto:gzhlu@ecust.edu.cn); [wangyanqin@ecust.edu.cn](mailto:wangyanqin@ecust.edu.cn). Fax:/Tel: +86-21-64253824

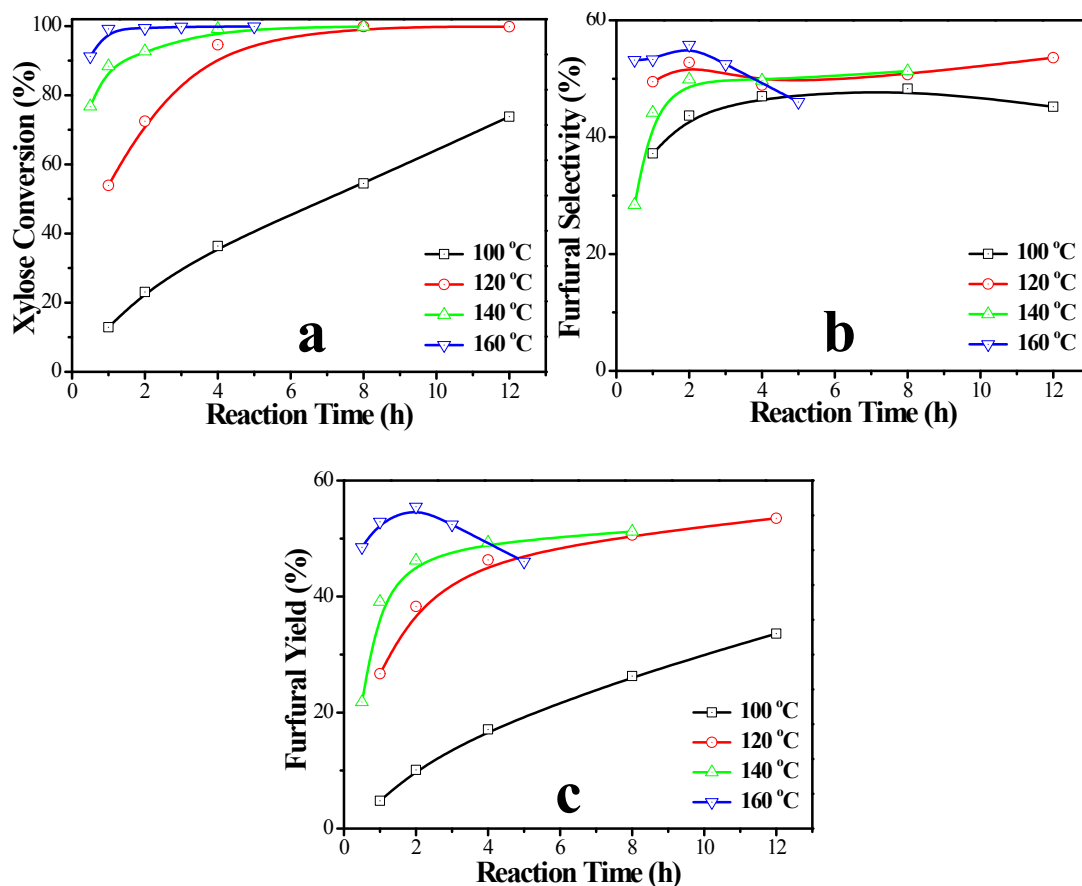

**Fig. S1** Time profiles for xylose conversion (a), furfural selectivity (b) and yield (c) with Sn-Mont catalyst at different temperatures. Reaction conditions: xylose (0.2 g, about 16.7 wt.% xylose solution calculated in aqueous phase on a salt free basis), Sn-Mont (0.1 g), THF (5 mL), H<sub>2</sub>O saturated with NaCl (1 mL).

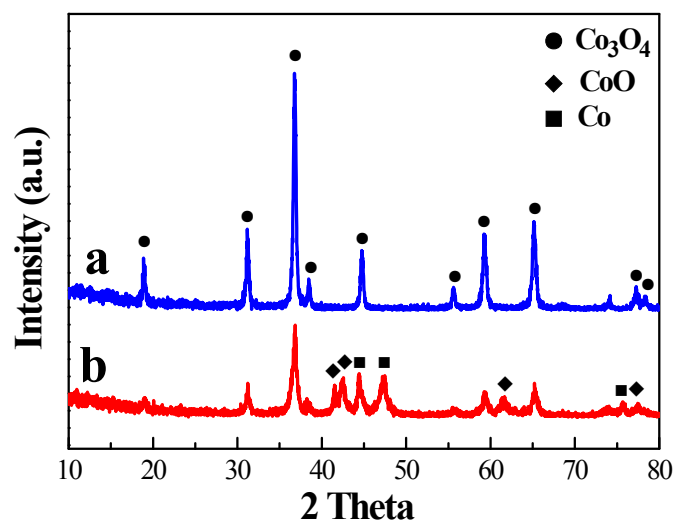

**Fig. S2** XRD pattern of 3.5 wt.% Ru/ $\text{Co}_3\text{O}_4$  catalyst before (a) and after (b) the hydrogenolysis reaction.
